# Supplementary material for: Murine Genetic Background Overcomes Gut Microbiota Changes to Explain Metabolic Response to High-Fat Diet
Source: MDPI journal article supplement (doi:10.3390/nu12020287), 2020-01-21
Supplement: s1 [file s1]

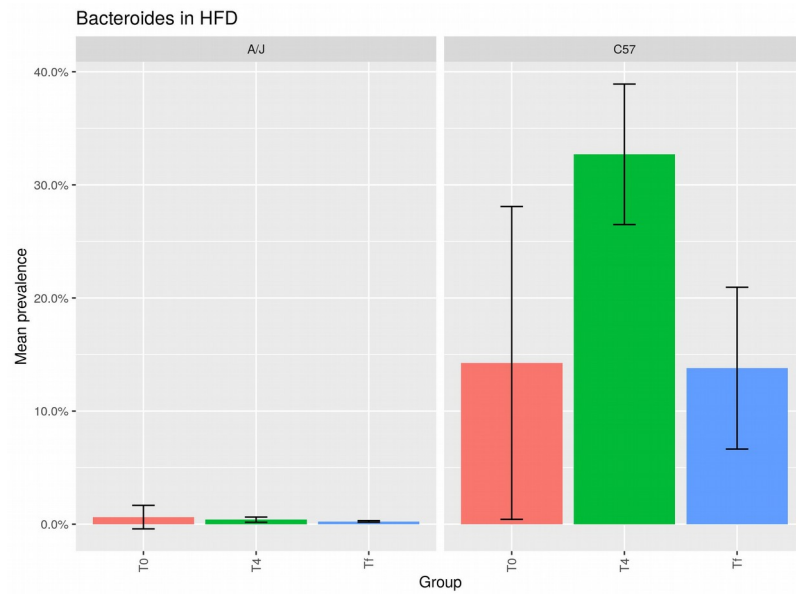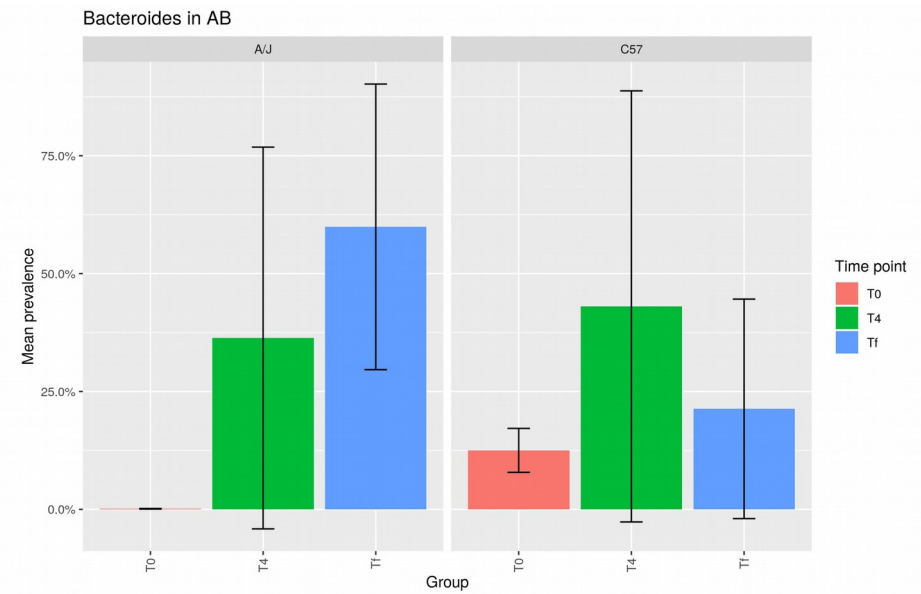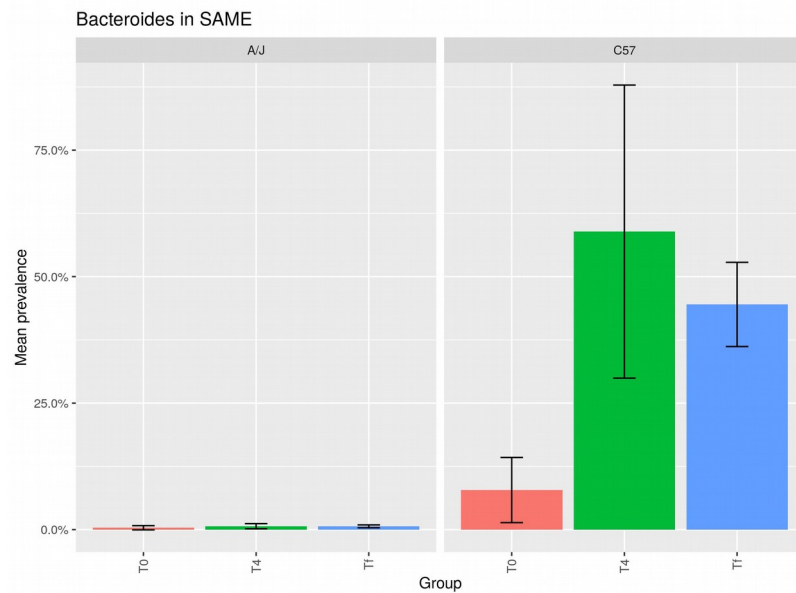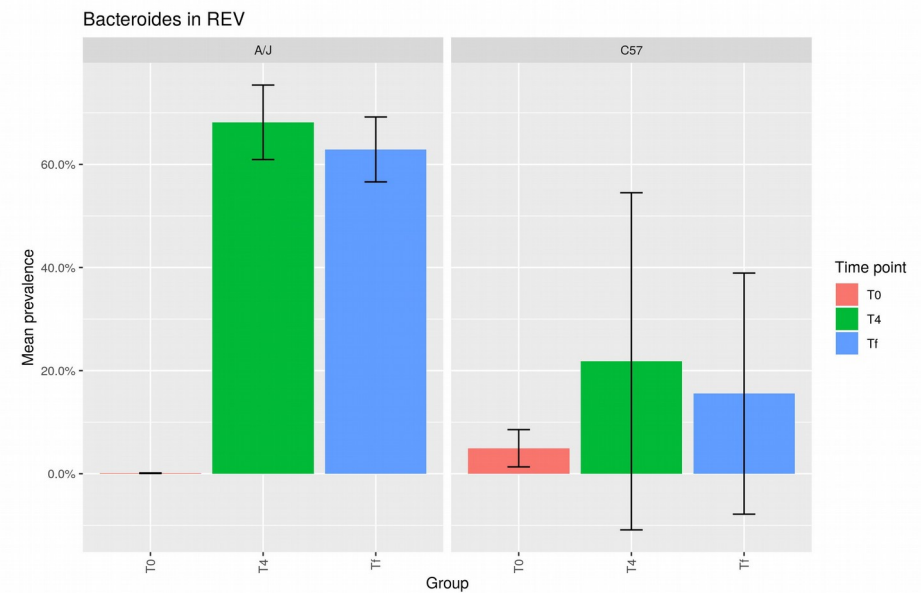

The mean prevalence of Bacteroides in A/J and C57 strain at different time points for different treatment groups.

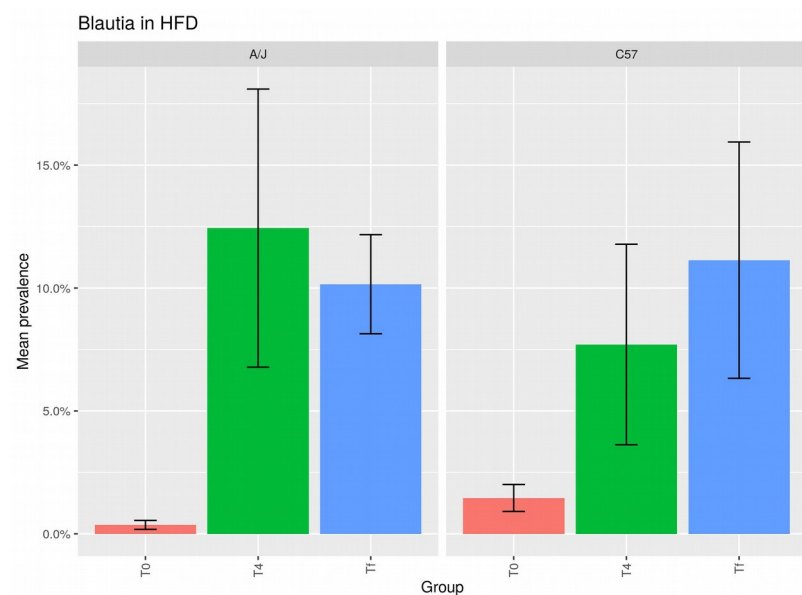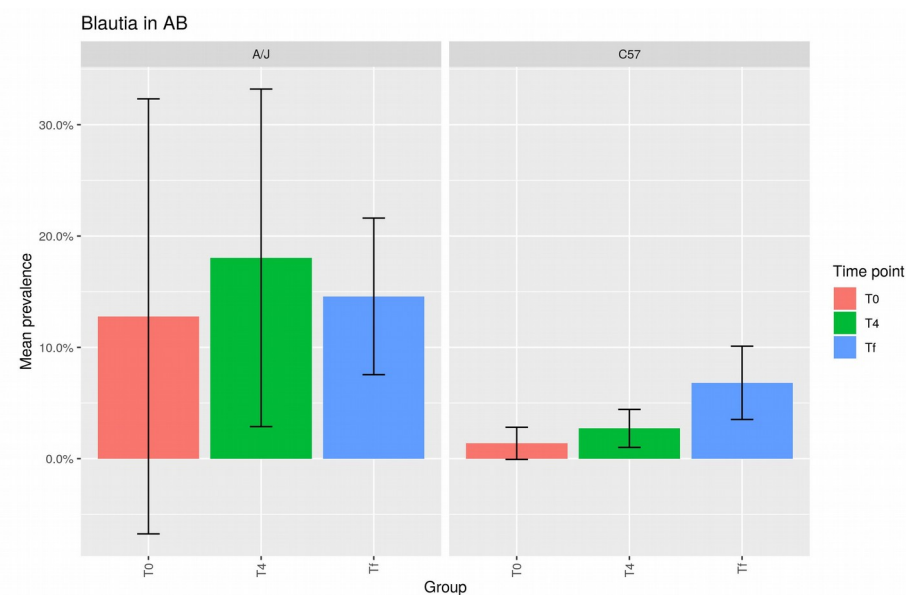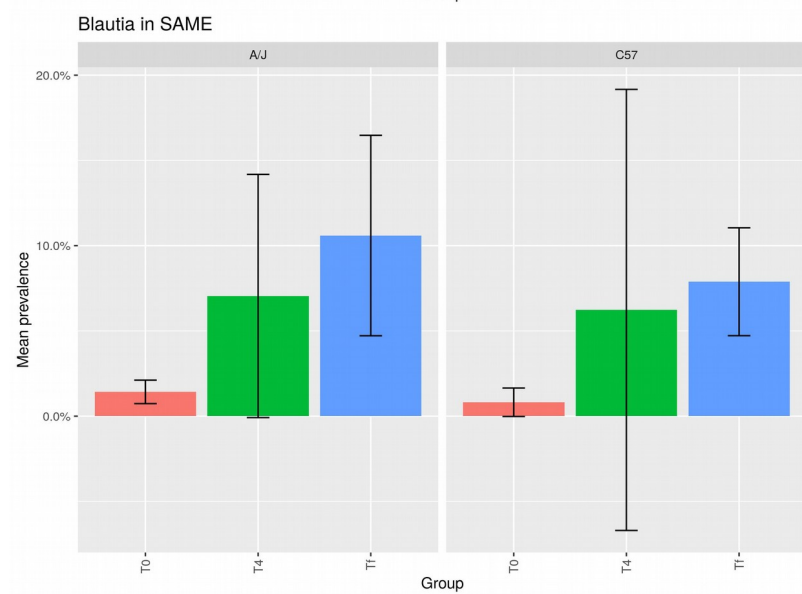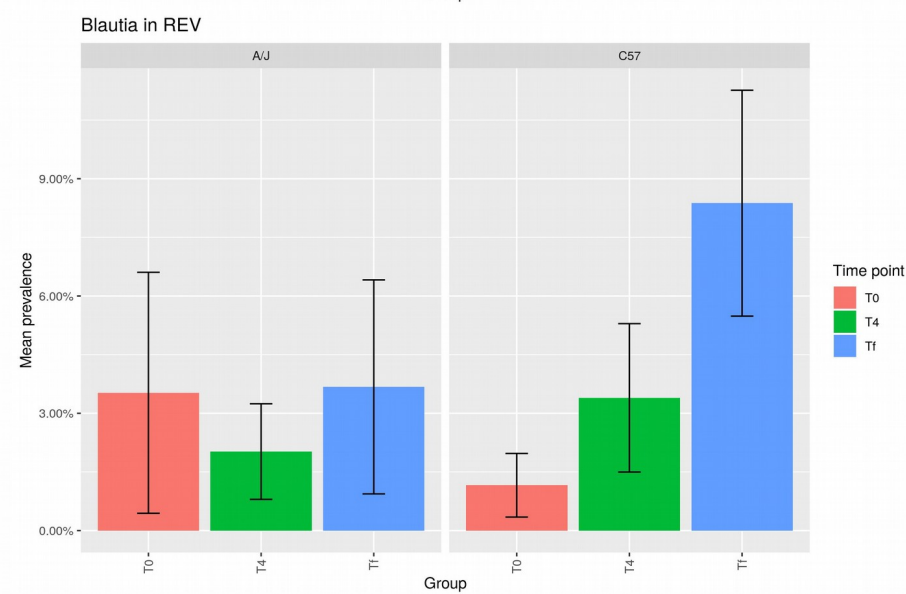

The mean prevalence of Blautia in A/J and C57 strain at different time points for different treatment groups.

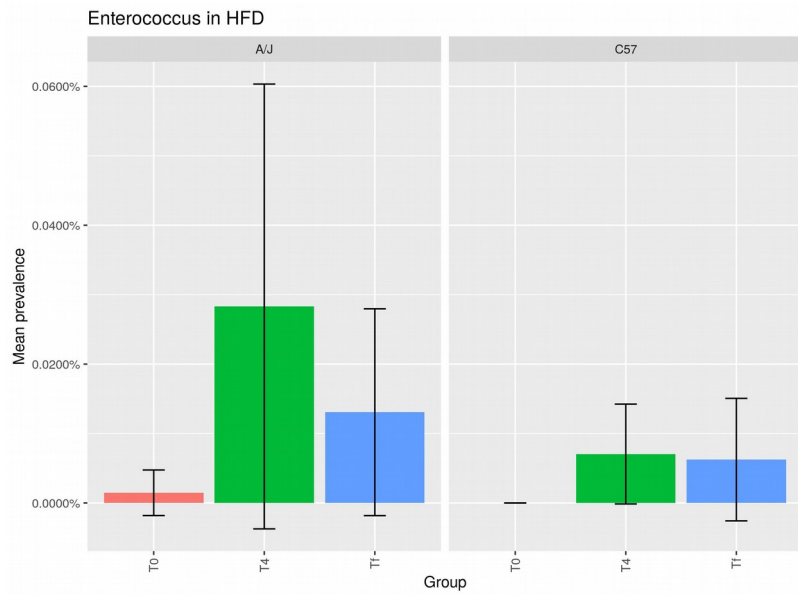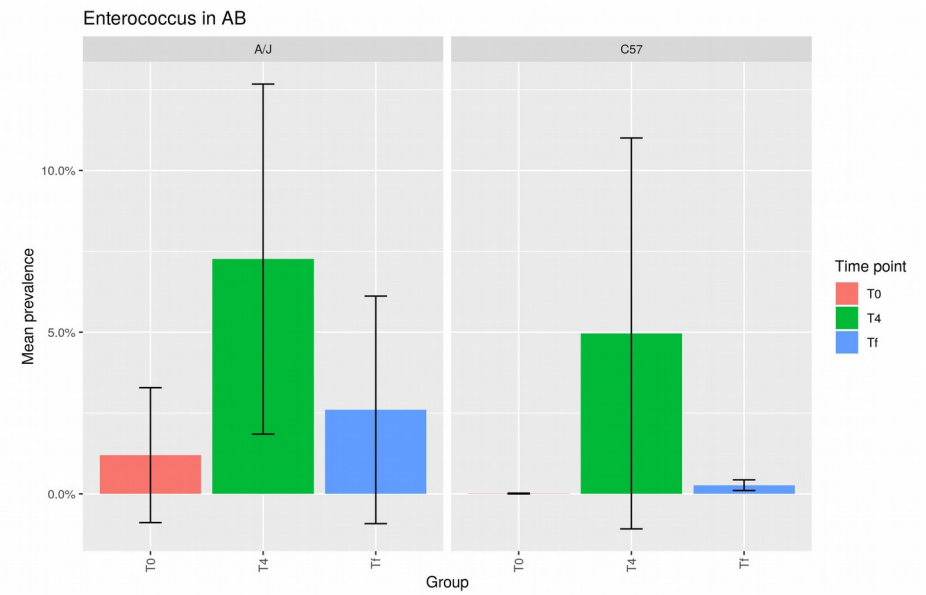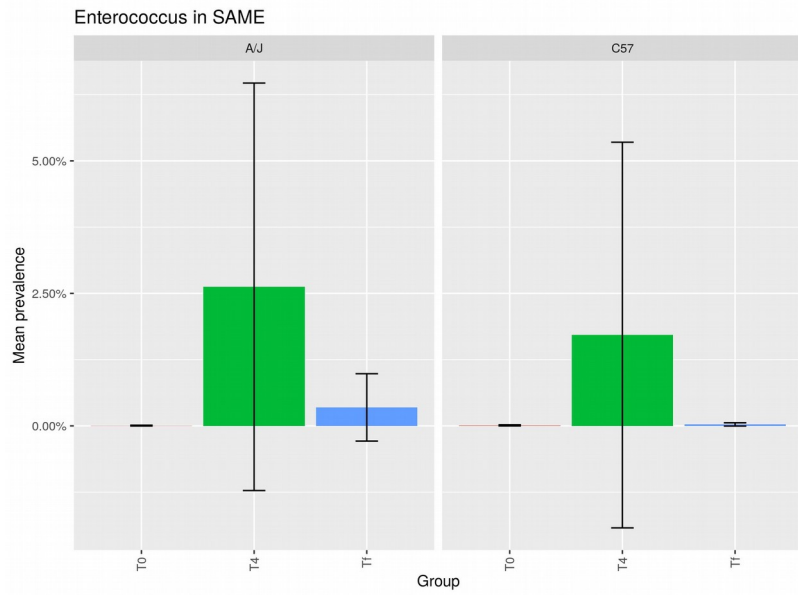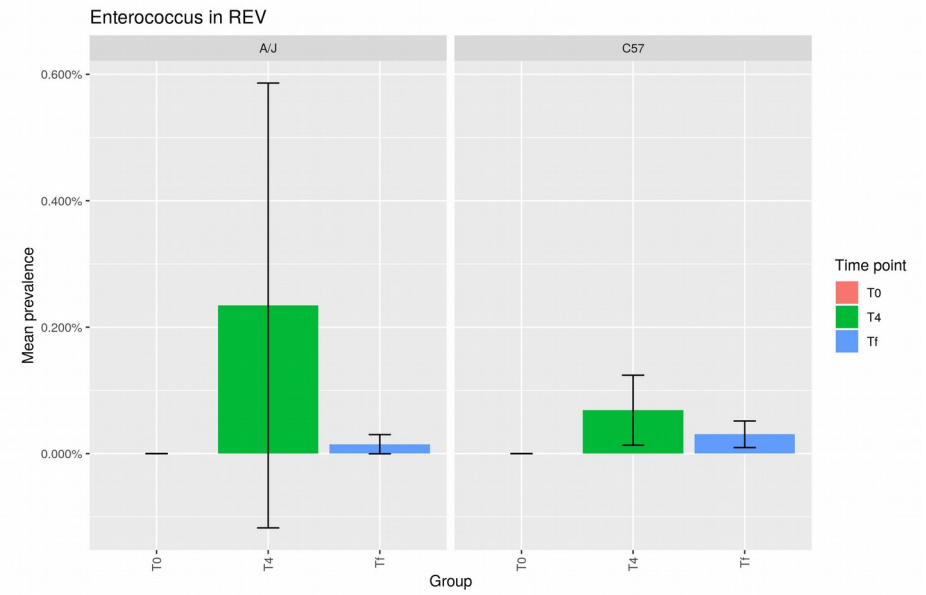

The mean prevalence of Enterococcus in A/J and C57 strain at different time points for different treatment groups.

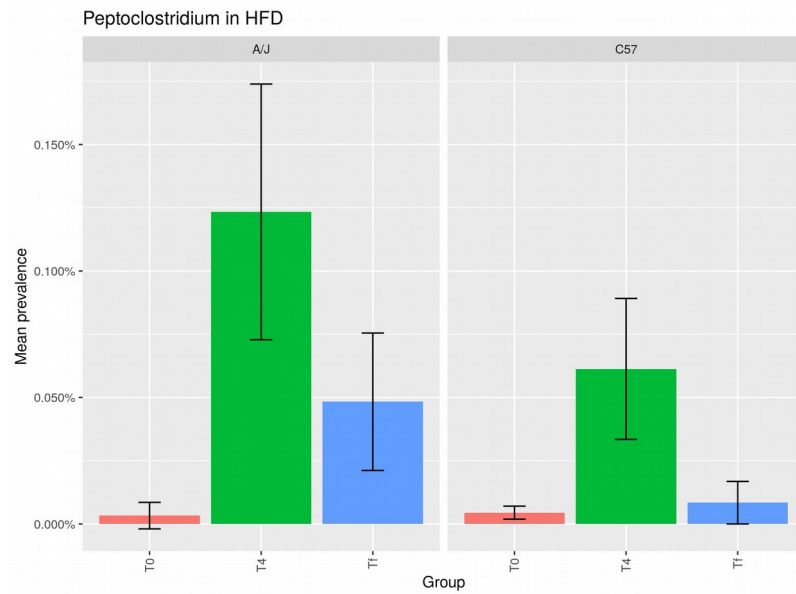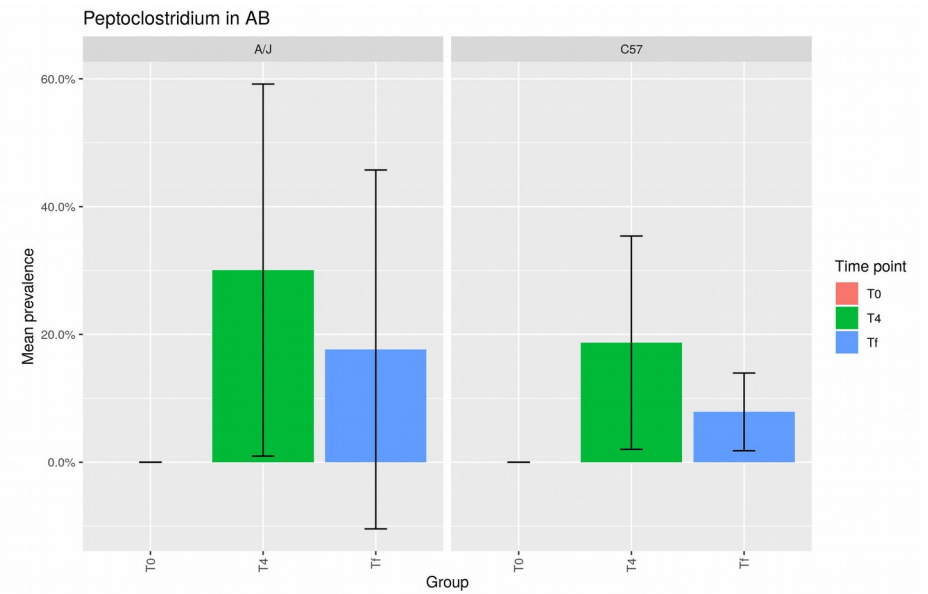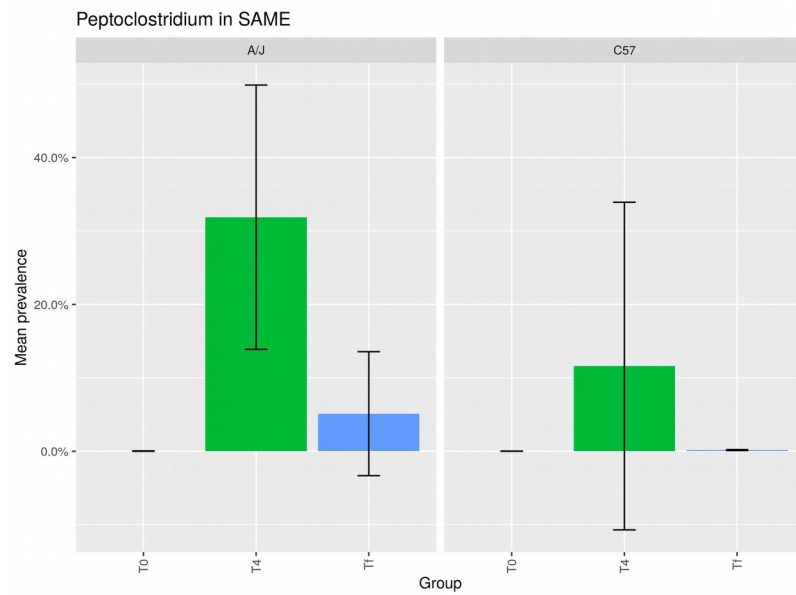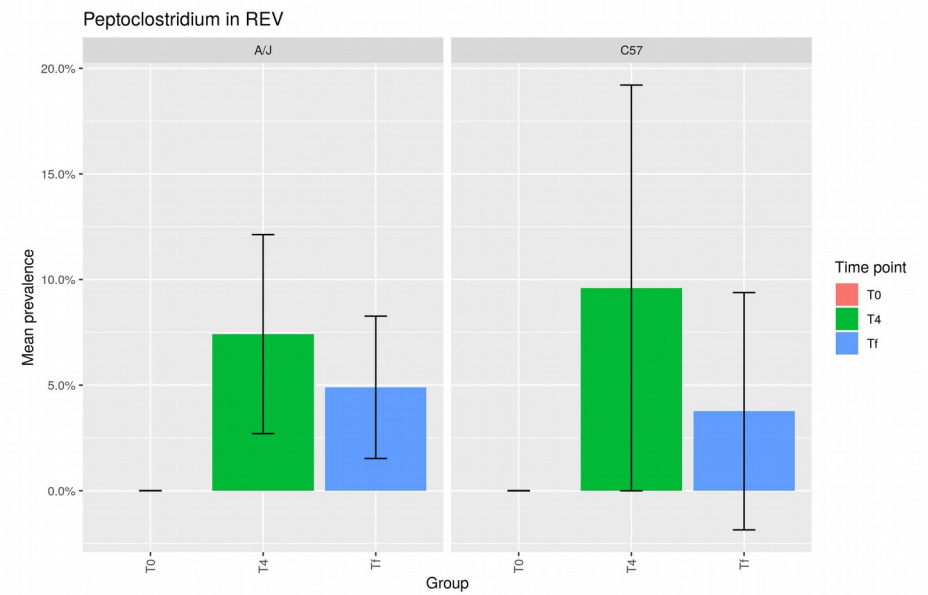

The mean prevalence of Peptoclostridium in A/J and C57 strain at different time points for different treatment groups.
