# Supplementary material for: Murine Genetic Background Overcomes Gut Microbiota Changes to Explain Metabolic Response to High-Fat Diet
Source: MDPI journal article supplement (doi:10.3390/nu12020287), 2020-01-21
Supplement: s1 [file s1]

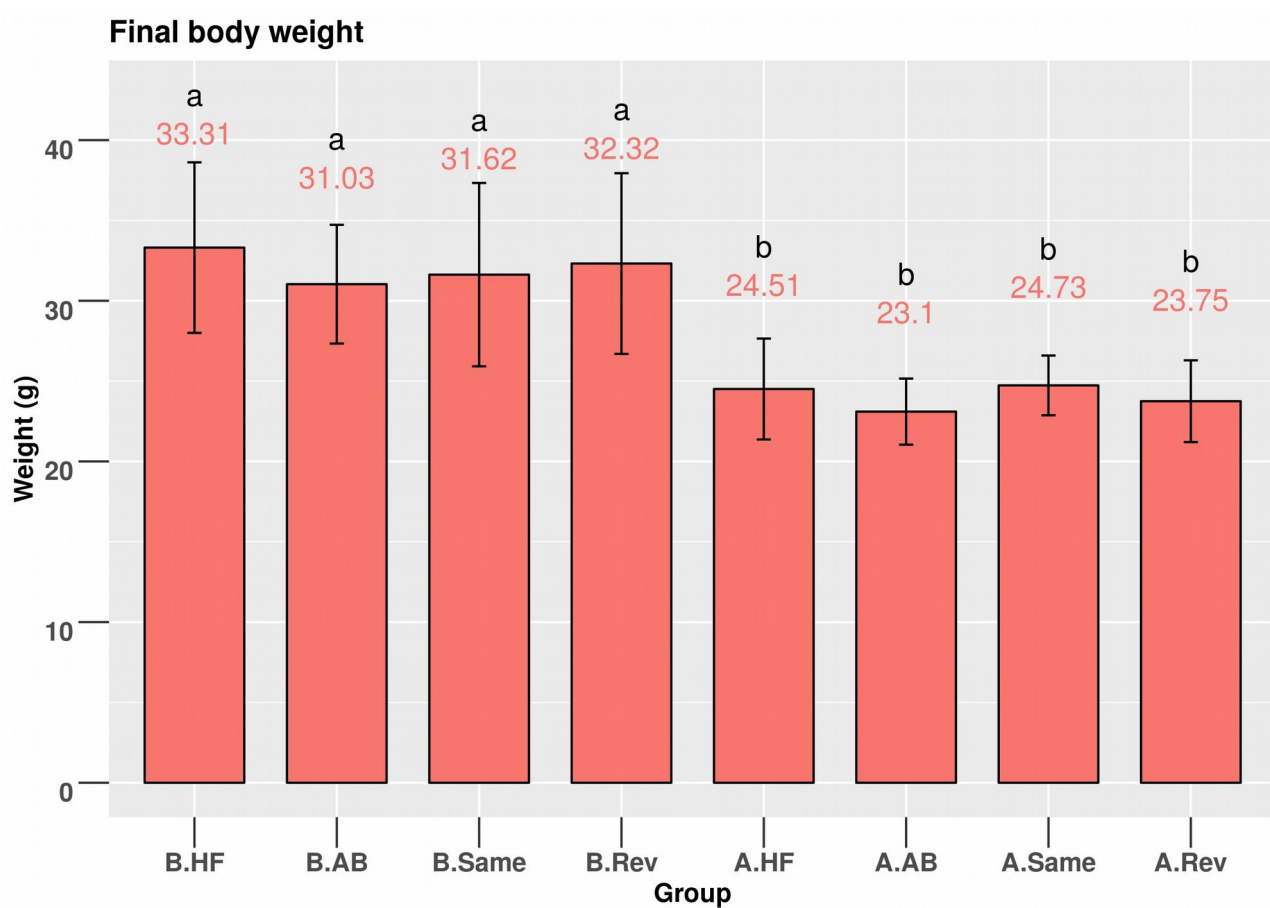

The final body weight of A/J and C57 mice in different experimental groups. A and B stand for A/J and C57, respectively.

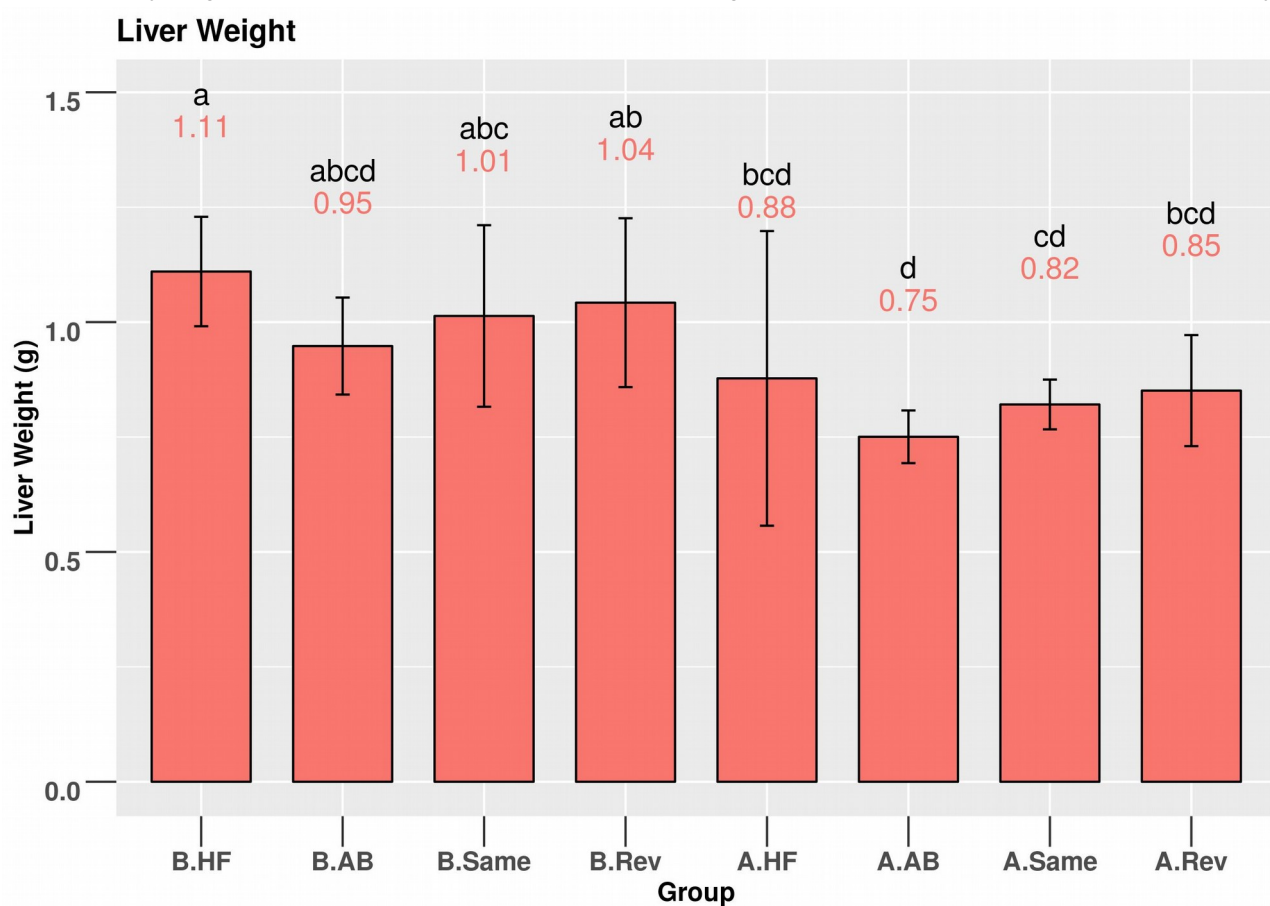

The liver weight of A/J and C57 mice in different experimental groups. A and B stand for A/J and C57, respectively.

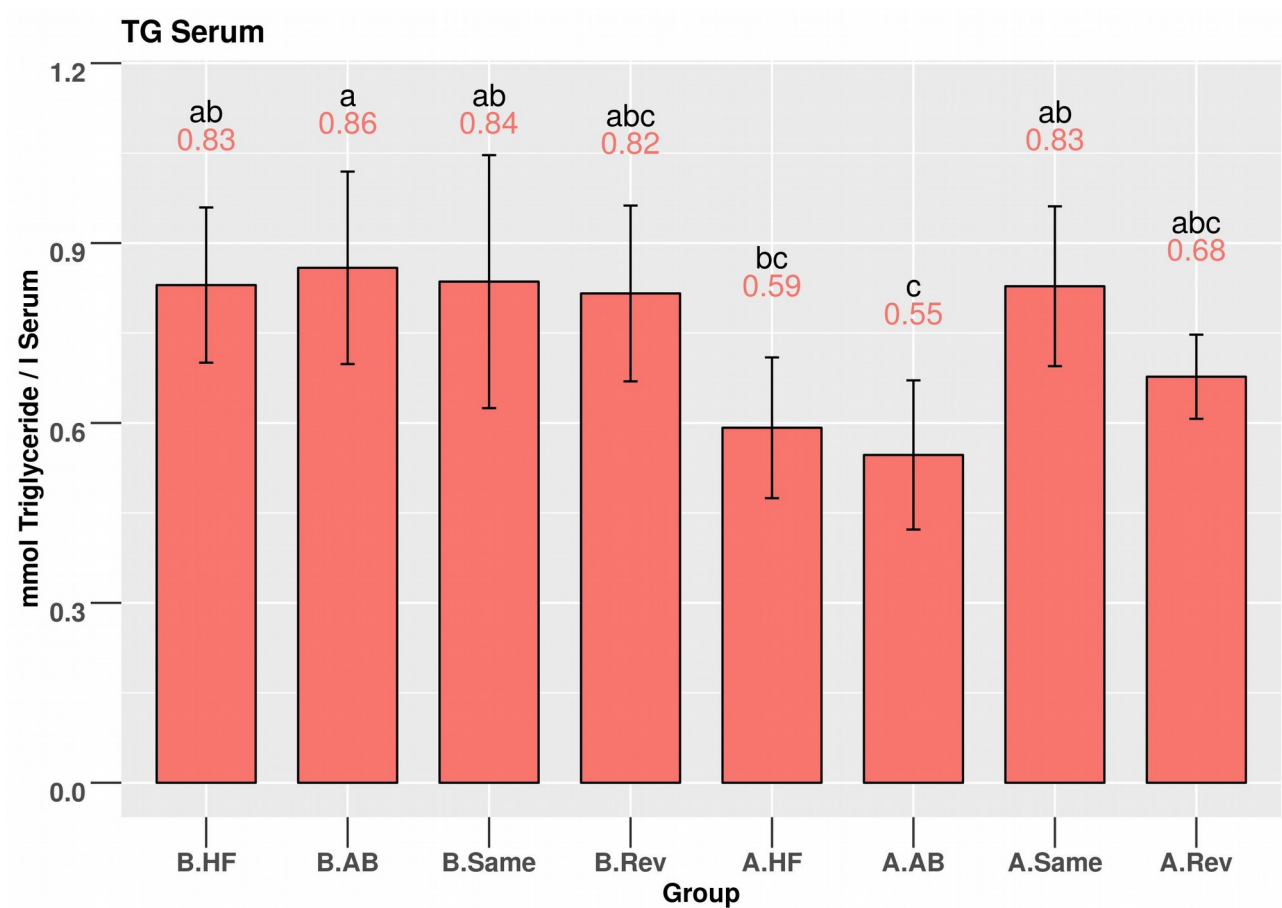

The triglyceride amount in the serum of A/J and C57 mice in different experimental groups. A and B stand for A/J and C57, respectively.

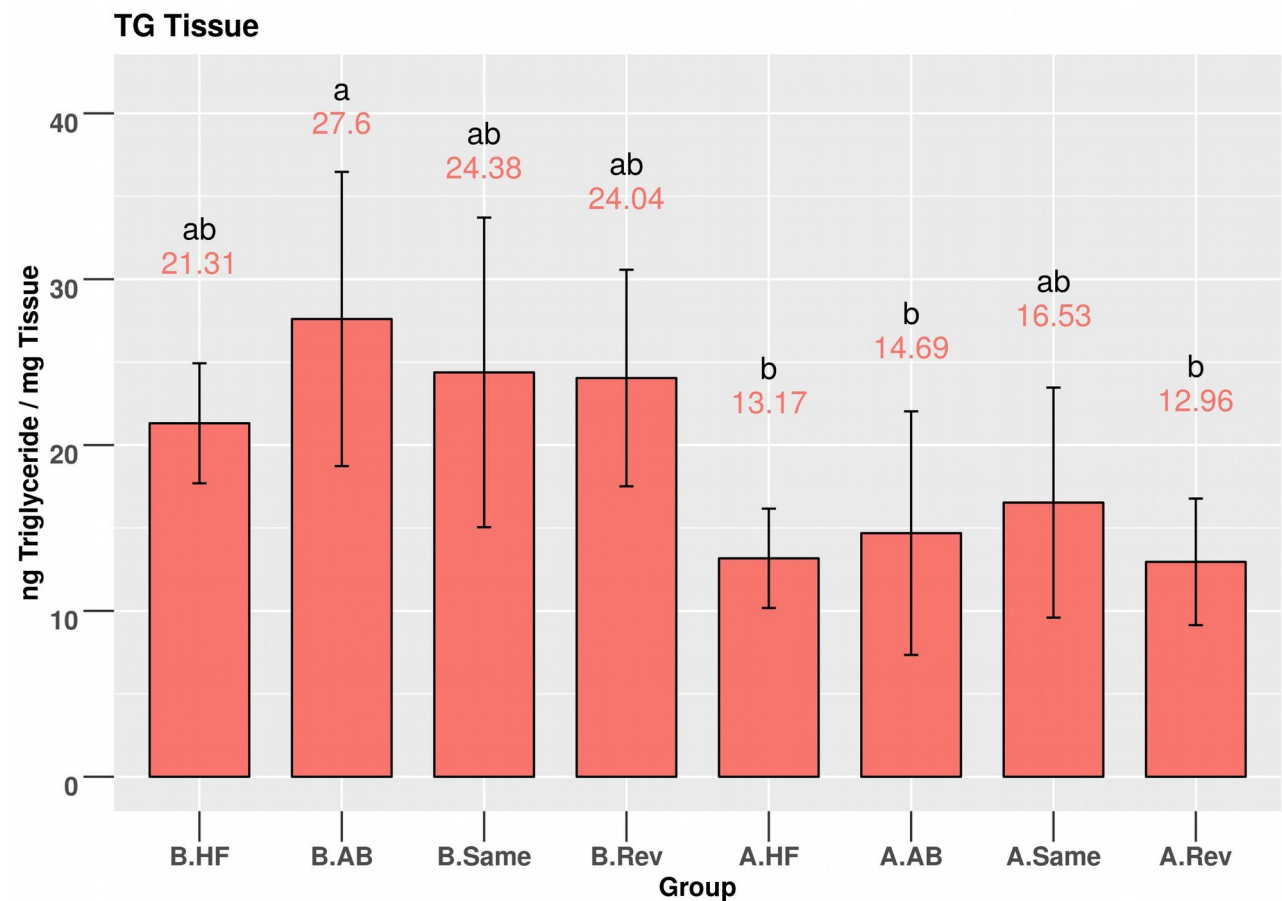

The triglyceride amount in the liver tissue of A/J and C57 mice in different experimental groups. A and B stand for A/J and C57, respectively.

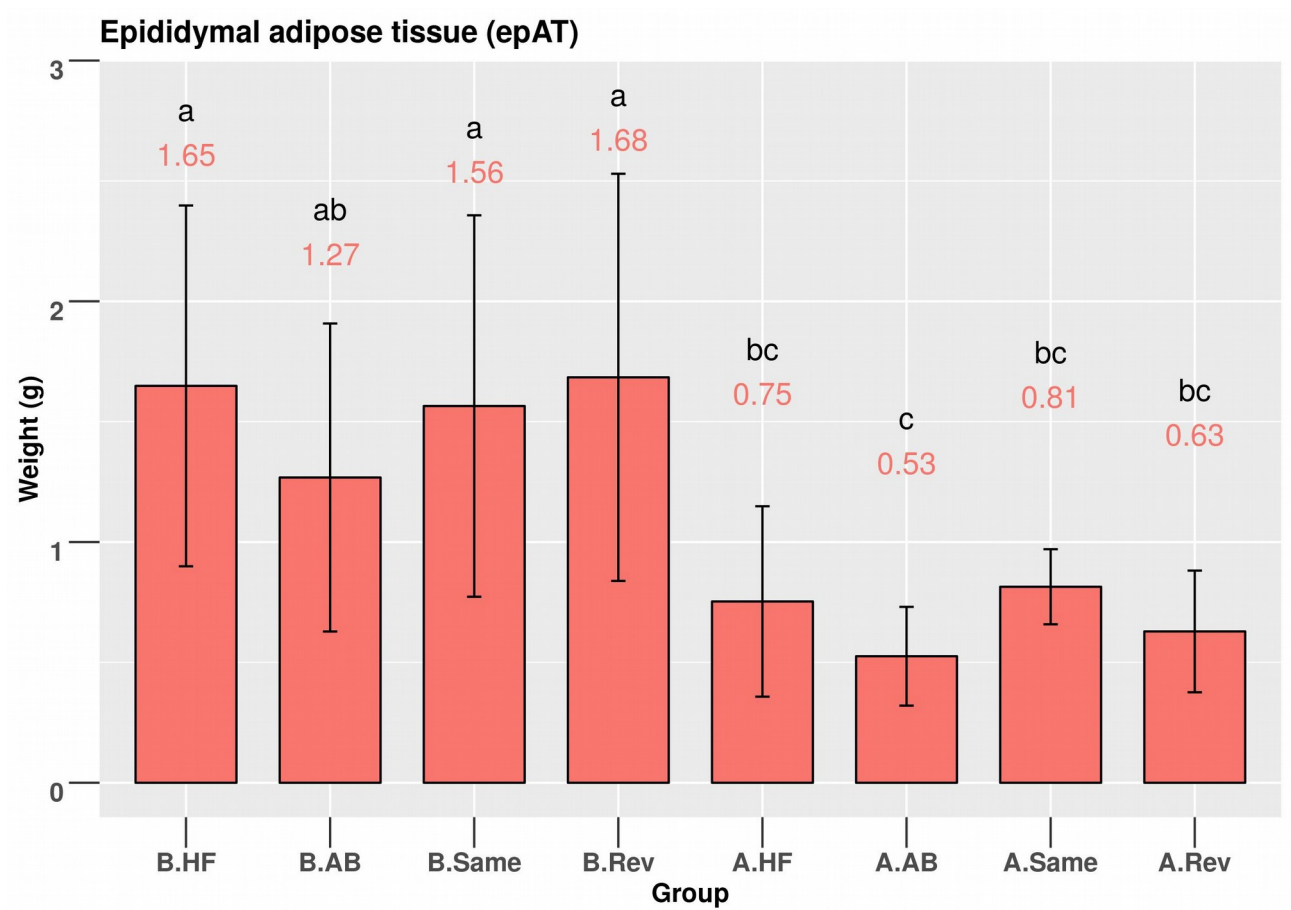

The epididymal adipose tissue weight of A/J and C57 mice in different experimental groups. A and B stand for A/J and C57, respectively.
