# Supplementary material for: Murine Genetic Background Overcomes Gut Microbiota Changes to Explain Metabolic Response to High-Fat Diet
Source: MDPI journal article supplement (doi:10.3390/nu12020287), 2020-01-21
Supplement: s1 [file s1]

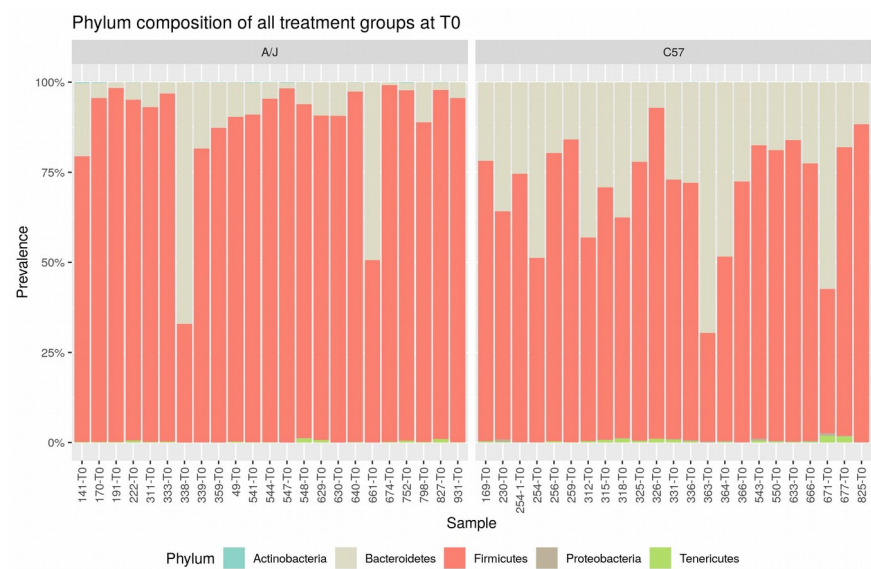

Different microbiome composition in the phylum level between A/J and C57 strain.

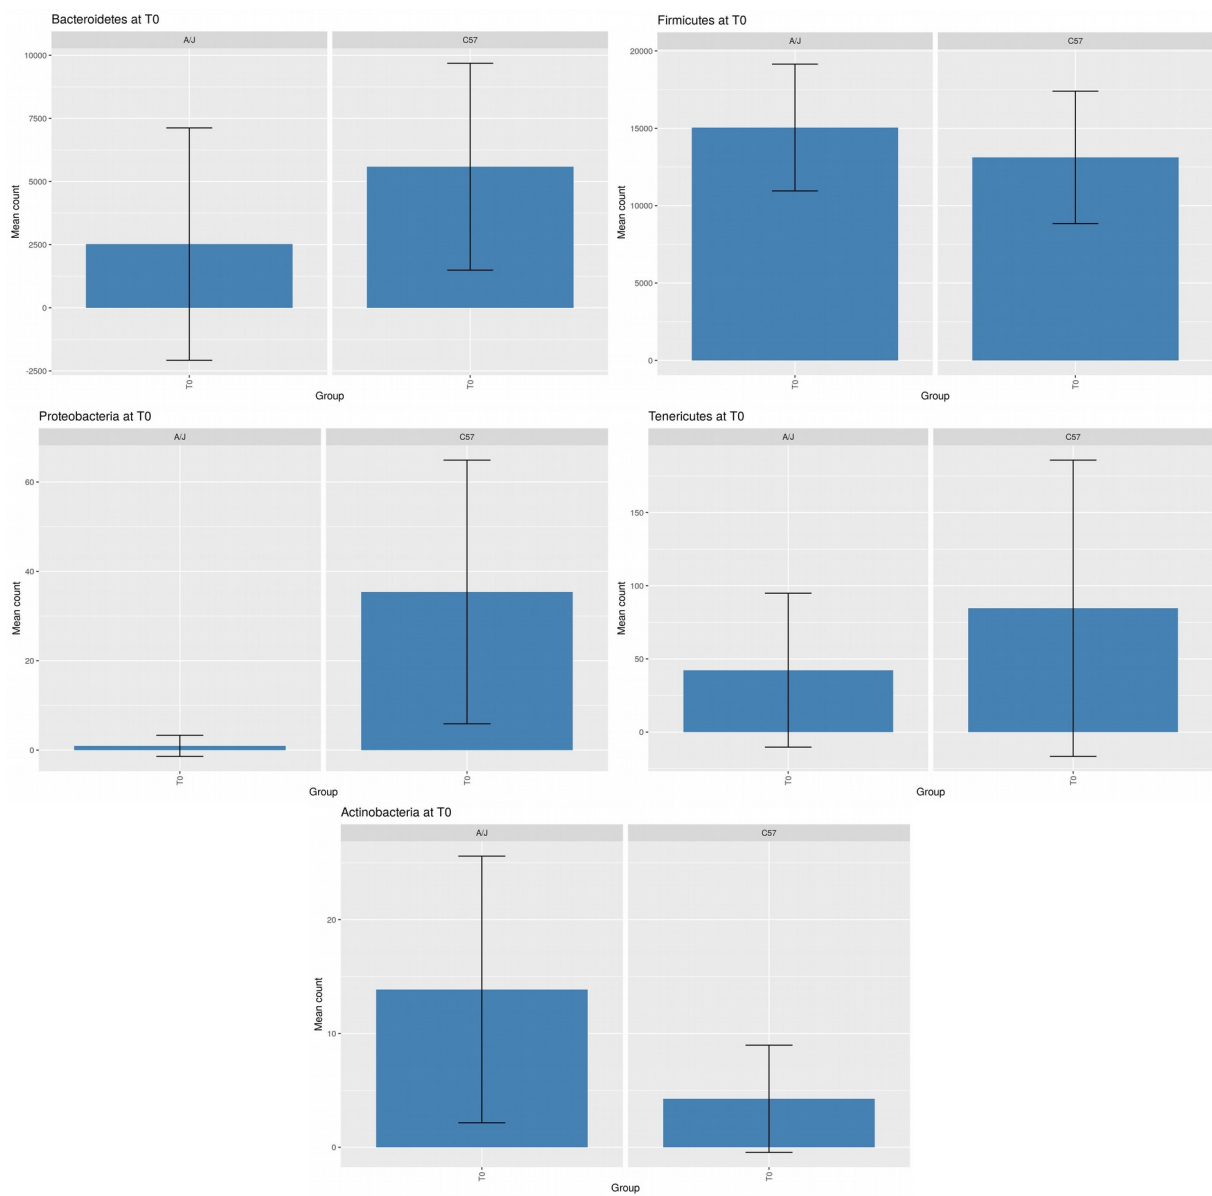

The mean group of different bacteria in A/J and C57 strain before treatment.
