# Supplementary figures and images for: Murine Genetic Background Overcomes Gut Microbiota Changes to Explain Metabolic Response to High-Fat Diet
Source: MDPI journal article supplement (doi:10.3390/nu12020287), 2020-01-21

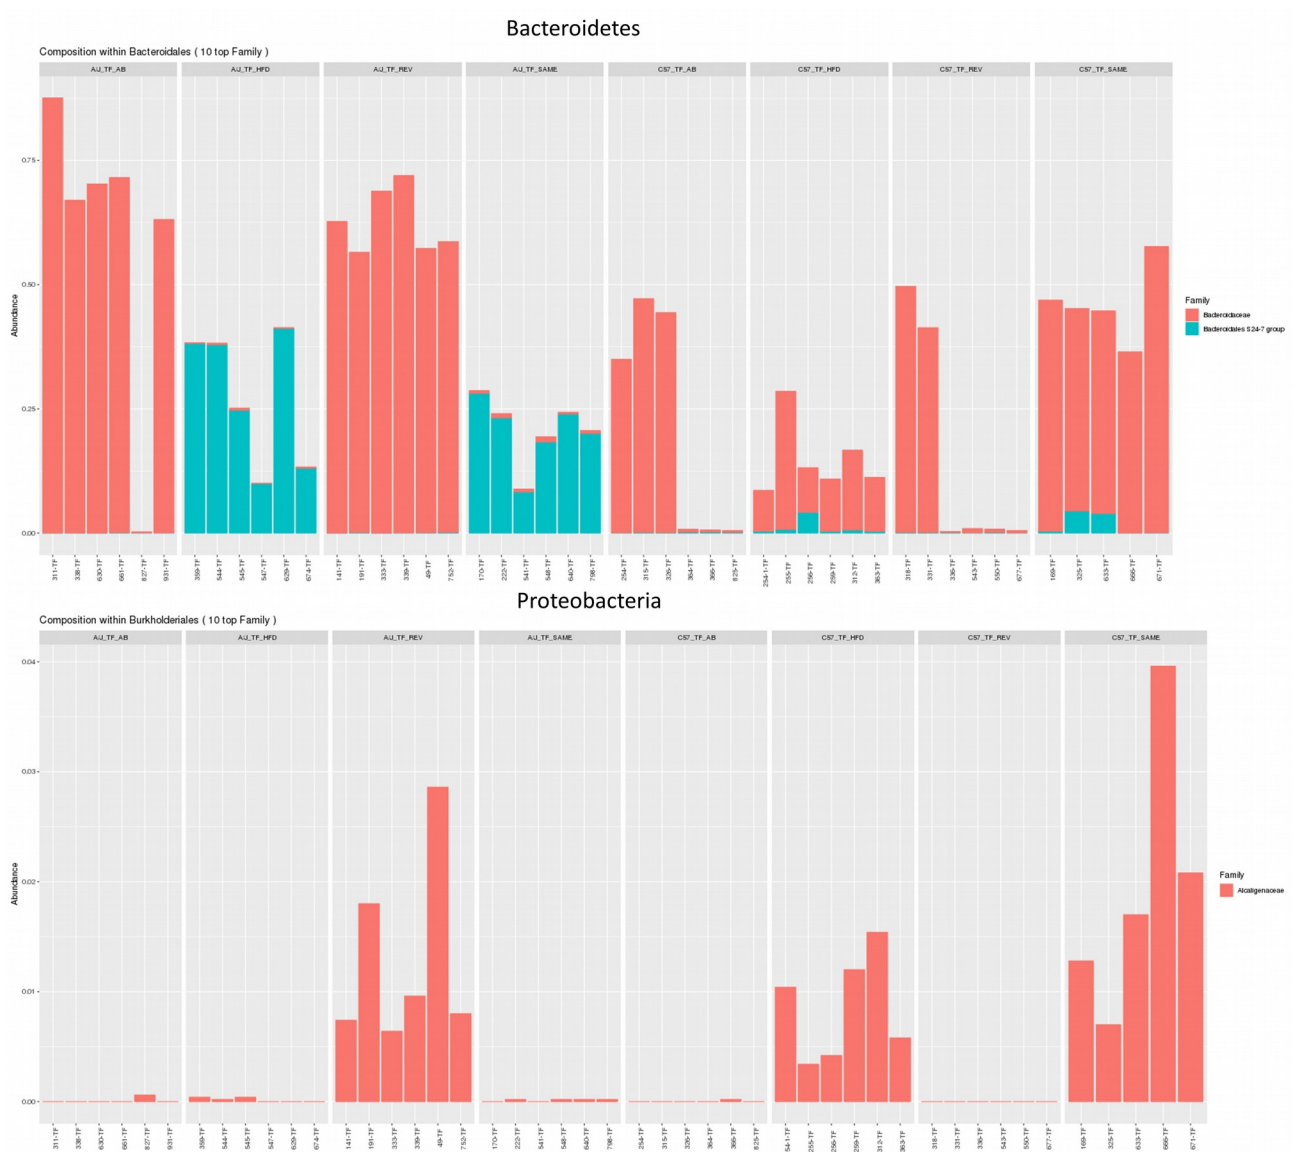

The abundance of some particular bacteria in A/J and C57 mice in different treatment groups.

Supplement: s1 [file s1]
